# Supplementary material for: A ternary cathode composed of LSM, YSZ and Ce0.9Mn0.1O2−δfor the intermediate temperature solid oxidefuel cells
Source: Royal Society of Chemistry journal article supplement (doi:10.1039/c2cc37007g), 2012-10-18
Supplement: c2cc37007g.pdf [file c2cc37007g.pdf]

## A ternary cathode composed of LSM, YSZ and $\text{Ce}_{0.9}\text{Mn}_{0.1}\text{O}_{2-\delta}$ for the intermediate temperature solid oxide fuel cells

Li Liu<sup>a,b,c</sup>, Zhe Zhao<sup>a,b,c</sup>, Xiaomin Zhang<sup>a,b,c</sup>, Daan Cui<sup>a,b</sup>, Baofeng Tu<sup>a,b</sup>, Dingrong Ou<sup>a,b</sup>, Mojie Cheng<sup>a,b,\*</sup>

a Division of Fuel Cells, Dalian National Laboratory for Clean Energy, Dalian 116023, China

b Laboratory of Fuel Cell, Dalian Institute of Chemical Physics, Chinese Academy of Sciences, Dalian 116023, China

c University of Chinese Academy of Sciences, Beijing, 100049, China

### Experimental

#### *Single cells fabrication*

Anode-supported fuel cells were fabricated by tape casting method.<sup>1</sup> YSZ (Tosoh-Zirconia; TZ-8Y) and NiO (from J.T.Baker) powders in a 50:50 wt% were mixed thoroughly, and then organic binders and n-butanol solvent were added to form the NiO-YSZ slurry. The slurry was fabricated into anode substrate by tape-casting. A thin layer of YSZ powder was fabricated on one side of the anode substrate by a slurry coating method, then the bilayer was cut into circular disks and sintered at 1300 °C for 3 h in air to obtain a dense YSZ electrolyte. The sintered discs were ~ 21 mm in diameter and ~ 450 μm in thickness. The thickness of the YSZ electrolyte film was ~ 15 μm.

The ternary cathode was composed of LSM, YSZ and Ce-Mn-O.  $(\text{La}_{0.8}\text{Sr}_{0.2})_{0.9}\text{MnO}_{3-\sigma}$  (LSM) was synthesized by ammonium citrate method<sup>2,3</sup> with  $\text{La}(\text{NO}_3)_3 \cdot 6\text{H}_2\text{O}$  (99.95%),  $\text{Sr}(\text{NO}_3)_2$  (99.95%) and  $\text{Mn}(\text{NO}_3)_2$  solution (49-51%) as raw materials, and calcined at 1100 °C for 2 h to form pure perovskite phase. LSM and YSZ in a 60:40 wt% as cathode were mixed through grinding in a mortar. Then, the powders were deposited on the electrolyte with an active area of 0.5 cm<sup>2</sup>, sintered at 1100 °C for 2 h and the thickness was ~20 μm. Pure LSM was used as the current collector, deposited on the surface of LSM-YSZ, and calcined at 1200 °C for 2 h. The Ce-Mn-O solution was infiltrated into LSM-YSZ cathode before testing to form the ternary cathode.

The  $\text{Ce}_{0.9}\text{Mn}_{0.1}\text{O}_{2-\delta}$  precursor solution of 2.0 M was composed of appropriate amounts of  $\text{Ce}(\text{NO}_3)_3 \cdot 6\text{H}_2\text{O}$  (99.99%),  $\text{Mn}(\text{NO}_3)_2$  solution (49-51%) with citric acid (the ratio of citric acid : cations was 0.5). The solution was pipetted into the LSM-YSZ composite cathode at 60 °C. The amount of  $\text{Ce}_{1-x}\text{Mn}_x\text{O}_{2-\delta}$  was varied by the volume of solution, and the cells were calcined at 600 °C for 1 h between each impregnation step. The powder composed of LSM and YSZ in a 60:40 wt% was calcined at 1100 °C for 2 h, infiltrated by 10 wt%  $\text{Ce}_{0.9}\text{Mn}_{0.1}\text{O}_{2-\delta}$  precursor solution, and then calcined at 600 °C for 2 h. The  $\text{Ce}_{0.9}\text{Mn}_{0.1}\text{O}_{2-\delta}$  precursor solution was heated and evaporated on a hot plate to remove the water and organic compounds, and then calcined at 600 °C for 2 h in air.

### ***Single cells testing***

The single cells were evaluated in an alumina test housing placed inside the furnace. The measurements were undertaken using the two-electrode four-wire measurement from 800 °C to 600 °C in 100 ml min<sup>-1</sup> humid H<sub>2</sub> (3% H<sub>2</sub>O) and 100 ml min<sup>-1</sup> O<sub>2</sub>. Au mesh at the cathode side and Ni mesh at the anode were used as current collectors. The electrochemical impedance spectra was measured under open circuit conditions using a Solartron 1260 frequency response analyzer with Solartron 1287 electrochemical interface. The frequency ranged from 10<sup>6</sup> Hz to 0.08 Hz with amplitude of 10 mA.

### ***Characterization of materials***

The microstructures of the ternary cathodes after the testing were examined by a Quanta 200 FEG (FEI Company) scanning electron microscope equipped with energy dispersive X-ray (EDX) spectroscopy. X-ray powder diffraction (XRD) patterns were collected with a Rigaku D/Max-2500/PC X-ray diffractometer with Cu K $\alpha$  radiation in the 2 $\theta$  range of 20-80°.

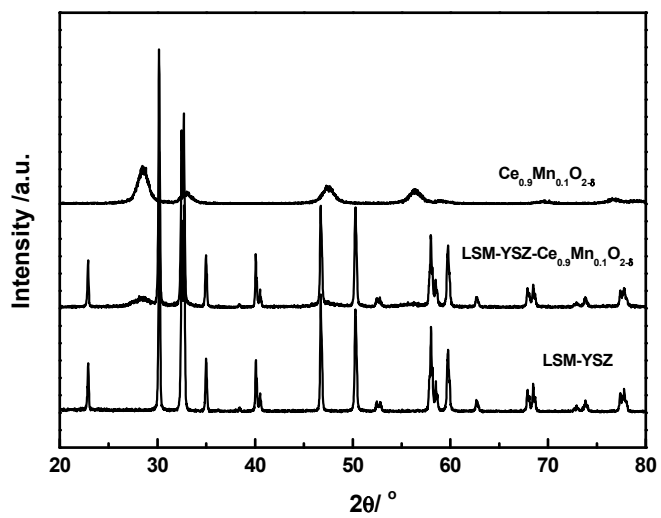

Fig. S1 The XRD patterns of LSM-YSZ powders with and without 10 wt%  $\text{Ce}_{0.9}\text{Mn}_{0.1}\text{O}_{2-\delta}$ , and  $\text{Ce}_{0.9}\text{Mn}_{0.1}\text{O}_{2-\delta}$  powders calcined at 600 °C for 2 h.

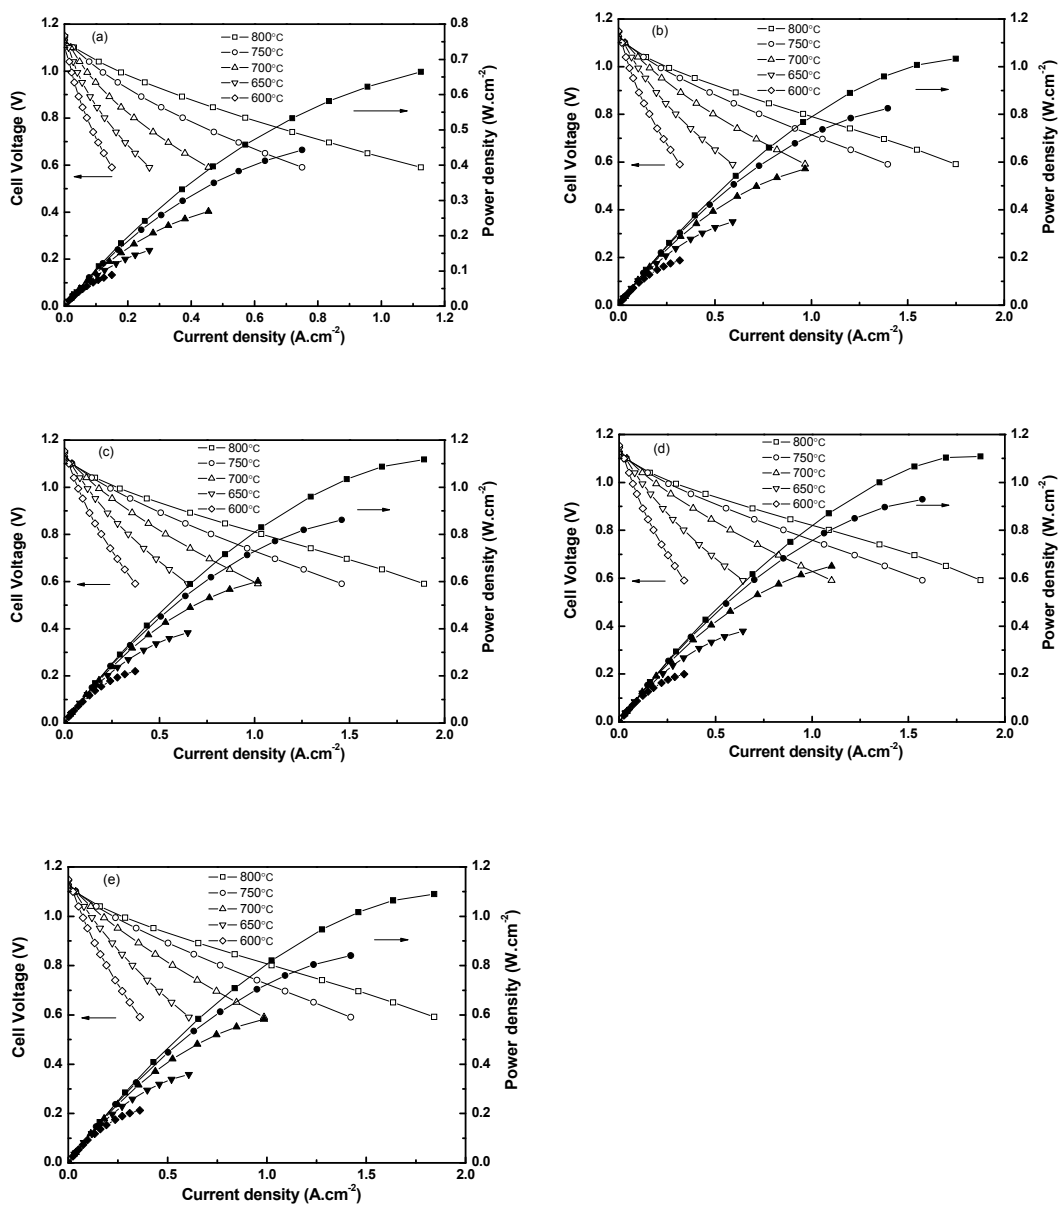

Fig. S2 I-V curves and the corresponding power densities of single cells with composite cathodes of (a) LSM-YSZ, (b) LSM-YSZ-5 wt%  $\text{Ce}_{0.9}\text{Mn}_{0.1}\text{O}_{2-\delta}$ , (c) LSM-YSZ-10 wt%  $\text{Ce}_{0.9}\text{Mn}_{0.1}\text{O}_{2-\delta}$ , (d) LSM-YSZ-20 wt%  $\text{Ce}_{0.9}\text{Mn}_{0.1}\text{O}_{2-\delta}$ , (e) LSM-YSZ-30 wt%  $\text{Ce}_{0.9}\text{Mn}_{0.1}\text{O}_{2-\delta}$ .\*

\*These cells with Ni-YSZ as anode and YSZ as electrolyte were fabricated by the same fabrication conditions and tested in humidified  $\text{H}_2$  (3 vol. %  $\text{H}_2\text{O}$ ) at  $100 \text{ ml min}^{-1}$  (at STP) in the anode and  $\text{O}_2$  at  $100 \text{ ml min}^{-1}$  (at STP) in the cathode.

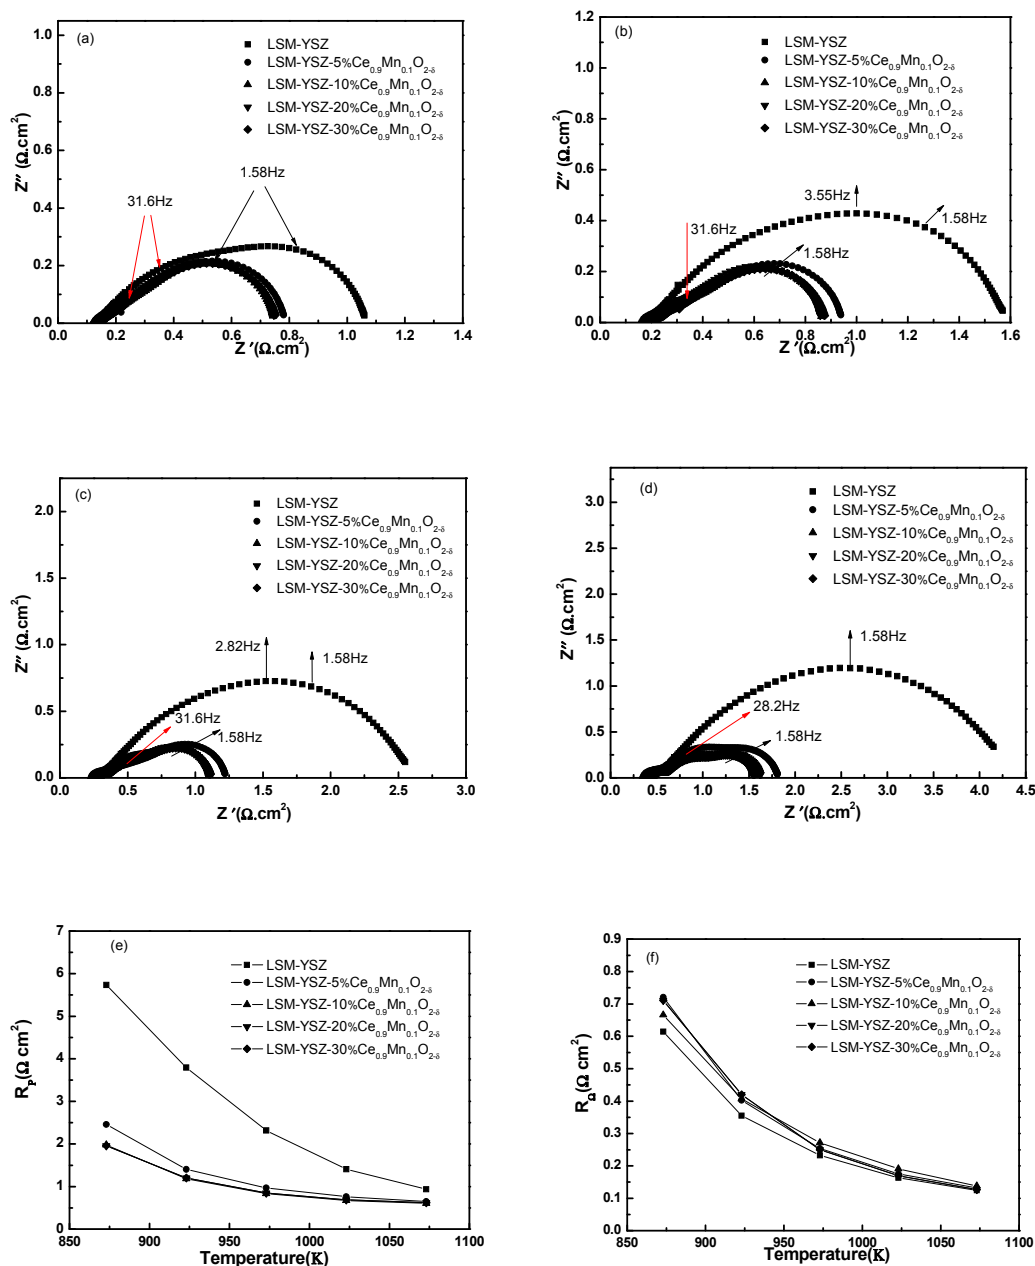

Fig. S3 Comparison of impedance spectra for the cells with LSM-YSZ-5, 10, 20,30 wt%  $\text{Ce}_{0.9}\text{Mn}_{0.1}\text{O}_{2.5}$  ternary cathodes or LSM-YSZ binary cathode measured under open circuit conditions at 800 °C(a); 750 °C(b); 700 °C(c); 650 °C(d); ASRs of the electrodes (sum of anode and cathode contributions) (e); ohmic resistances of the cells with different cathodes(f)\*

\*The high frequency intercept on real axis represents the overall ohmic resistances  $R_{ohm}$  from the electrolyte, the electrodes (including the cathode and anode), the interfaces of electrodes/electrolyte and the connection wires. The distance between the high-frequency and low-frequency intercepts with the real axis represents the electrodes polarization resistances  $R_p$  (sum of anode and cathode contributions). The polarization of  $\text{O}_2$  reduction on the LSM-YSZ cathode is much higher than that of  $\text{H}_2$

oxidation on Ni-YSZ anode, so the impedance spectra for a single cell mainly reflect the properties of the cathodes.<sup>4</sup>

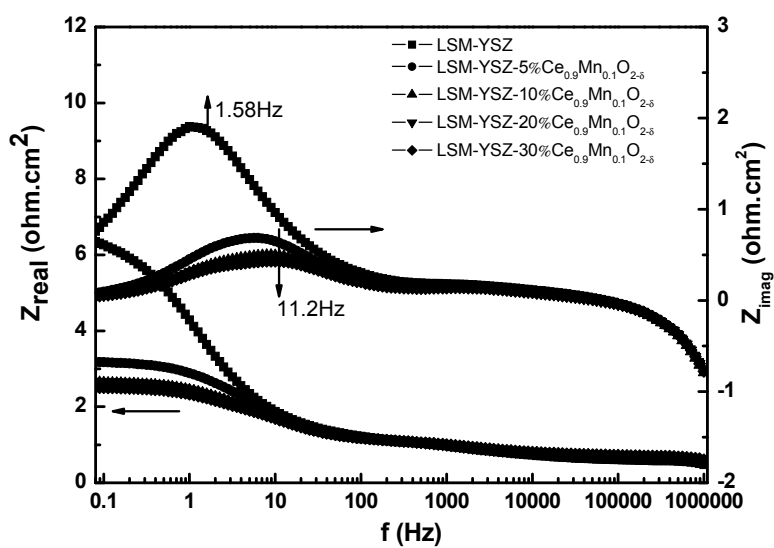

Fig. S4 Bode plots of single cells with LSM-YSZ-5, 10, 20, 30 wt% Ce<sub>0.9</sub>Mn<sub>0.1</sub>O<sub>2-δ</sub> ternary cathodes or LSM-YSZ binary cathode at 600 °C.

## References

- 1 M. Zhang, M. Yang, B. Liu, Z. Hou, Y. Dong, M. J. Cheng, *J. Power Sources*, 2008, **175**, 739.
- 2 R. A. De Souza, J. A. Kilner, *Solid State Ion.*, 1998, **106**, 175.
- 3 K. Yamahara, C. P. Jacobson, S. J. Visco, X. F. Zhang, L. C. De Jonghe, *Solid State Ion.*, 2005, **176**, 275.
- 4 Yi Jiang, Anil V. Virkar and Feng Zhao, *J. Electrochem. Soc.*, 2001, **148**, A1091.
